# Supplementary material for: Protein domains and architectural innovation in plant-associated Proteobacteria
Source: Springer Nature journal article supplement (doi:10.1186/1471-2164-6-17), 2005-02-16
Supplement: Additional file 2 [file 1471-2164-6-17-s2.pdf]

| <b>Species</b>                                                                                                  | <b>Number of proteins</b> |
|-----------------------------------------------------------------------------------------------------------------|---------------------------|
| <i>Streptomyces coelicolor</i>                                                                                  | 5355                      |
| <i>Acinetobacter</i> sp. (strain ADP1)                                                                          | 2388                      |
| <i>Aeropyrum pernix</i>                                                                                         | 1070                      |
| <i>Agrobacterium tumefaciens</i> (strain C58 / ATCC 33970 (Washington University))                              | 4077                      |
| <i>Agrobacterium tumefaciens</i> (strain C58 / ATCC 33970)                                                      | 4073                      |
| <i>Anabaena</i> sp. (strain PCC 7120)                                                                           | 3612                      |
| <i>Aquifex aeolicus</i>                                                                                         | 1235                      |
| <i>Archaeoglobus fulgidus</i>                                                                                   | 1723                      |
| <i>Bacillus anthracis</i> (strain Ames)                                                                         | 3344                      |
| <i>Bacillus anthracis</i> str. Ames 0581                                                                        | 3401                      |
| <i>Bacillus anthracis</i> str. Sterne                                                                           | 3544                      |
| <i>Bacillus cereus</i> (strain ATCC 10987)                                                                      | 3603                      |
| <i>Bacillus cereus</i> (strain ATCC 14579 / DSM 31)                                                             | 3434                      |
| <i>Bacillus halodurans</i>                                                                                      | 2927                      |
| <i>Bacillus subtilis</i>                                                                                        | 2992                      |
| <i>Bacillus thuringiensis</i> (subsp. konkukian)                                                                | 3511                      |
| <i>Bacteroides thetaiotaomicron</i>                                                                             | 2828                      |
| <i>Bartonella henselae</i> ( <i>Rochalimaea henselae</i> )                                                      | 1064                      |
| <i>Bartonella quintana</i> ( <i>Rochalimaea quintana</i> ) ( <i>Rochalimaea quintana</i> )                      | 931                       |
| <i>Bdellovibrio bacteriovorus</i>                                                                               | 1947                      |
| <i>Bifidobacterium longum</i>                                                                                   | 1293                      |
| <i>Bordetella bronchiseptica</i> ( <i>Alcaligenes bronchisepticus</i> )                                         | 3988                      |
| <i>Bordetella parapertussis</i>                                                                                 | 3455                      |
| <i>Bordetella pertussis</i>                                                                                     | 2711                      |
| <i>Borrelia burgdorferi</i> (Lyme disease spirochete) (Lyme disease spirochete)                                 | 985                       |
| <i>Bradyrhizobium japonicum</i>                                                                                 | 5652                      |
| <i>Brucella melitensis</i>                                                                                      | 2331                      |
| <i>Buchnera aphidicola</i> (subsp. <i>Acyrtosiphon pisum</i> ) ( <i>Acyrtosiphon pisum</i> symbiotic bacterium) | 547                       |
| <i>Buchnera aphidicola</i> (subsp. <i>Baizongia pistaciae</i> )                                                 | 483                       |
| <i>Buchnera aphidicola</i> (subsp. <i>Schizaphis graminum</i> )                                                 | 541                       |
| <i>Campylobacter jejuni</i>                                                                                     | 1208                      |

| <b>Species</b>                                                                                      | <b>Number of proteins</b> |
|-----------------------------------------------------------------------------------------------------|---------------------------|
| Candidatus Blochmannia floridanus                                                                   | 546                       |
| Caulobacter crescentus                                                                              | 2693                      |
| Chlamydia muridarum                                                                                 | 648                       |
| Chlamydia pneumoniae strain AR39                                                                    | 712                       |
| Chlamydia pneumoniae strain CWL029                                                                  | 715                       |
| Chlamydia pneumoniae strain J138                                                                    | 724                       |
| Chlamydia trachomatis                                                                               | 641                       |
| Chlamydophila caviae                                                                                | 687                       |
| Chlamydophila pneumoniae TW-183                                                                     | 719                       |
| Chlorobium tepidum                                                                                  | 1438                      |
| Chromobacterium violaceum                                                                           | 3105                      |
| Clostridium acetobutylicum                                                                          | 2652                      |
| Clostridium perfringens                                                                             | 2001                      |
| Clostridium tetani                                                                                  | 1796                      |
| Corynebacterium diphtheriae                                                                         | 1506                      |
| Corynebacterium efficiens                                                                           | 1967                      |
| Corynebacterium glutamicum (Brevibacterium flavum)                                                  | 1992                      |
| Corynebacterium glutamicum (Brevibacterium flavum) IS fingerprint type 4-5                          | 1962                      |
| Coxiella burnetii                                                                                   | 1171                      |
| Deinococcus radiodurans                                                                             | 2057                      |
| Desulfovibrio vulgaris (strain Hildenborough / ATCC 29579 / NCIMB 8303)                             | 2186                      |
| Enterococcus faecalis (Streptococcus faecalis) (Streptococcus faecalis)                             | 2117                      |
| Erwinia carotovora (subsp. atroseptica) (Pectobacterium atrosepticum) (Pectobacterium atrosepticum) | 3482                      |
| Escherichia coli                                                                                    | 3513                      |
| Escherichia coli O157:H7                                                                            | 4016                      |
| Escherichia coli O157:H7 strain EDL933                                                              | 4011                      |
| Escherichia coli O6                                                                                 | 3766                      |
| Fusobacterium nucleatum (subsp. nucleatum)                                                          | 1437                      |
| Geobacter sulfurreducens                                                                            | 2375                      |
| Gloeobacter violaceus                                                                               | 2809                      |
| Haemophilus ducreyi                                                                                 | 1176                      |

| <b>Species</b>                                                                   | <b>Number of proteins</b> |
|----------------------------------------------------------------------------------|---------------------------|
| Haemophilus influenzae                                                           | 1447                      |
| Halobacterium sp. (strain NRC-1 / ATCC 700922 / JCM 11081)                       | 1472                      |
| Helicobacter hepaticus                                                           | 1173                      |
| Helicobacter pylori (Campylobacter pylori) (Campylobacter pylori)                | 1058                      |
| Helicobacter pylori J99 (Campylobacter pylori J99)                               | 1063                      |
| Lactobacillus johnsonii                                                          | 1329                      |
| Lactobacillus plantarum                                                          | 2208                      |
| Lactococcus lactis (subsp. lactis) (Streptococcus lactis) (Streptococcus lactis) | 1694                      |
| Leifsonia xyli (subsp. xyli)                                                     | 1379                      |
| Leptospira interrogans                                                           | 2261                      |
| Leptospira interrogans (serogroup Icterohaemorrhagiae / serovar Copenhageni)     | 2076                      |
| Listeria innocua                                                                 | 2253                      |
| Listeria monocytogenes                                                           | 2215                      |
| Listeria monocytogenes (serotype 4b / strain F2365)                              | 2173                      |
| Mesoplasma florum (Acholeplasma florum) (Acholeplasma florum)                    | 494                       |
| Methanobacterium thermoautotrophicum                                             | 1330                      |
| Methanococcus jannaschii                                                         | 1267                      |
| Methanococcus maripaludis                                                        | 1267                      |
| Methanopyrus kandleri                                                            | 1071                      |
| Methanosarcina acetivorans                                                       | 2682                      |
| Methanosarcina mazei (Methanosarcina frisia) (Methanosarcina frisia)             | 2144                      |
| Mycobacterium bovis                                                              | 2199                      |
| Mycobacterium leprae                                                             | 1144                      |
| Mycobacterium paratuberculosis                                                   | 3070                      |
| Mycobacterium tuberculosis                                                       | 2230                      |
| Mycobacterium tuberculosis CDC1551                                               | 2150                      |
| Mycoplasma gallisepticum                                                         | 479                       |
| Mycoplasma genitalium                                                            | 376                       |
| Mycoplasma mobile                                                                | 430                       |
| Mycoplasma mycoides (subsp. mycoides SC)                                         | 590                       |
| Mycoplasma penetrans                                                             | 666                       |
| Mycoplasma pneumoniae                                                            | 510                       |

| <b>Species</b>                                                                                        | <b>Number of proteins</b> |
|-------------------------------------------------------------------------------------------------------|---------------------------|
| <i>Mycoplasma pulmonis</i>                                                                            | 501                       |
| <i>Nanoarchaeum equitans</i>                                                                          | 318                       |
| <i>Neisseria meningitidis</i> (serogroup A)                                                           | 1371                      |
| <i>Neisseria meningitidis</i> (serogroup B)                                                           | 1332                      |
| <i>Nitrosomonas europaea</i>                                                                          | 1761                      |
| <i>Oceanobacillus iheyensis</i>                                                                       | 2592                      |
| Onion yellows phytoplasma                                                                             | 430                       |
| <i>Parachlamydia</i> sp. (strain UAE25) (subsp. <i>Acanthamoeba</i> sp.)                              | 1143                      |
| <i>Pasteurella multocida</i>                                                                          | 1712                      |
| <i>Photobacterium profundum</i> ( <i>Photobacterium</i> sp. (strain SS9))                             | 3744                      |
| <i>Photorhabdus luminescens</i> (subsp. <i>laumondii</i> )                                            | 3077                      |
| <i>Picrophilus torridus</i>                                                                           | 1094                      |
| <i>Porphyromonas gingivalis</i> ( <i>Bacteroides gingivalis</i> ) ( <i>Bacteroides gingivalis</i> )   | 1160                      |
| <i>Prochlorococcus marinus</i>                                                                        | 1154                      |
| <i>Prochlorococcus marinus</i> (strain MIT 9313)                                                      | 1425                      |
| <i>Prochlorococcus marinus</i> subsp. <i>pastoris</i> (strain CCMP 1378 / MED4)                       | 1129                      |
| <i>Propionibacterium acnes</i>                                                                        | 1627                      |
| <i>Pseudomonas aeruginosa</i>                                                                         | 4324                      |
| <i>Pseudomonas putida</i> (strain KT2440)                                                             | 3982                      |
| <i>Pseudomonas syringae</i> (pv. <i>tomato</i> )                                                      | 3863                      |
| <i>Pyrobaculum aerophilum</i>                                                                         | 1416                      |
| <i>Pyrococcus abyssi</i>                                                                              | 1409                      |
| <i>Pyrococcus furiosus</i>                                                                            | 1480                      |
| <i>Pyrococcus horikoshii</i>                                                                          | 1315                      |
| <i>Ralstonia solanacearum</i> ( <i>Pseudomonas solanacearum</i> ) ( <i>Pseudomonas solanacearum</i> ) | 3534                      |
| <i>Rhizobium loti</i> ( <i>Mesorhizobium loti</i> )                                                   | 5126                      |
| <i>Rhizobium meliloti</i> ( <i>Sinorhizobium meliloti</i> ) ( <i>Sinorhizobium meliloti</i> )         | 4694                      |
| <i>Rhodopirellula baltica</i>                                                                         | 3174                      |
| <i>Rhodopseudomonas palustris</i>                                                                     | 3502                      |
| <i>Rickettsia conorii</i>                                                                             | 774                       |
| <i>Rickettsia prowazekii</i>                                                                          | 677                       |
| <i>Salmonella enterica</i> subsp. <i>enterica</i> serovar <i>Typhi</i> Ty2                            | 3235                      |

| <b>Species</b>                                               | <b>Number of proteins</b> |
|--------------------------------------------------------------|---------------------------|
| Salmonella typhi                                             | 3381                      |
| Salmonella typhimurium                                       | 3566                      |
| Shewanella oneidensis                                        | 2925                      |
| Shigella flexneri                                            | 3308                      |
| Shigella flexneri 2a str. 2457T                              | 3122                      |
| Staphylococcus aureus (strain MRSA252)                       | 1969                      |
| Staphylococcus aureus (strain MSSA476)                       | 1966                      |
| Staphylococcus aureus (strain Mu50 / ATCC 700699)            | 1680                      |
| Staphylococcus aureus (strain N315)                          | 1619                      |
| Staphylococcus epidermidis                                   | 1784                      |
| Streptococcus agalactiae (serotype III)                      | 1468                      |
| Streptococcus agalactiae (serotype V)                        | 1489                      |
| Streptococcus mutans                                         | 1452                      |
| Streptococcus pneumoniae                                     | 1415                      |
| Streptococcus pneumoniae (strain ATCC BAA-255 / R6)          | 1451                      |
| Streptococcus pyogenes                                       | 1186                      |
| Streptococcus pyogenes (serotype M18)                        | 1250                      |
| Streptococcus pyogenes (serotype M3)                         | 1213                      |
| Streptococcus pyogenes SSI-1                                 | 1228                      |
| Streptomyces avermitilis                                     | 5041                      |
| Sulfolobus solfataricus                                      | 1929                      |
| Sulfolobus tokodaii                                          | 1660                      |
| Synechococcus elongatus (Thermosynechococcus elongatus)      | 1766                      |
| Synechococcus sp. (strain WH8102)                            | 1522                      |
| Synechocystis sp. (strain PCC 6803)                          | 2355                      |
| Thermoanaerobacter tengcongensis                             | 1907                      |
| Thermoplasma acidophilum                                     | 1086                      |
| Thermoplasma volcanium                                       | 1080                      |
| Thermotoga maritima                                          | 1460                      |
| Thermus thermophilus (strain HB27 / ATCC BAA-163 / DSM 7039) | 1649                      |
| Treponema denticola                                          | 1532                      |
| Treponema pallidum                                           | 696                       |
| Tropheryma whipplei (strain TW08/27) (Whipple's bacillus)    | 590                       |

| <b>Species</b>                                                                                                 | <b>Number of proteins</b> |
|----------------------------------------------------------------------------------------------------------------|---------------------------|
| <i>Tropheryma whipplei</i> (strain Twist) (Whipple's bacillus)                                                 | 590                       |
| <i>Ureaplasma parvum</i> ( <i>Ureaplasma urealyticum</i> biotype 1) ( <i>Ureaplasma urealyticum</i> biotype 1) | 398                       |
| <i>Vibrio cholerae</i>                                                                                         | 2737                      |
| <i>Vibrio parahaemolyticus</i>                                                                                 | 3373                      |
| <i>Vibrio vulnificus</i>                                                                                       | 3299                      |
| <i>Vibrio vulnificus</i> (strain YJ016)                                                                        | 3318                      |
| <i>Wigglesworthia glossinidia brevipalpis</i>                                                                  | 575                       |
| <i>Wolbachia pipientis</i> wMel                                                                                | 705                       |
| <i>Wolinella succinogenes</i>                                                                                  | 1523                      |
| <i>Xanthomonas axonopodis</i> (pv. citri)                                                                      | 3074                      |
| <i>Xanthomonas campestris</i> (pv. campestris)                                                                 | 2990                      |
| <i>Xylella fastidiosa</i>                                                                                      | 1553                      |
| <i>Xylella fastidiosa</i> (strain Temecula1 / ATCC 700964)                                                     | 1442                      |
| <i>Yersinia pestis</i>                                                                                         | 3031                      |
| <i>Yersinia pestis</i> biovar Mediaevails                                                                      | 3004                      |
| <i>Yersinia pestis</i> KIM                                                                                     | 2978                      |

Table 6. Completely sequenced prokaryotic genomes available in Pfam at the time of this study.
